# Supplementary material for: Multi-walled carbon nanotubes enhanced fungal colonization and suppressed innate immune response to fungal infection in nematodes
Source: Royal Society of Chemistry journal article supplement (doi:10.1039/c5tx00373c), 2016-01-01
Supplement: c5tx00373c1.pdf [file c5tx00373c1.pdf]

**Supporting Information:**

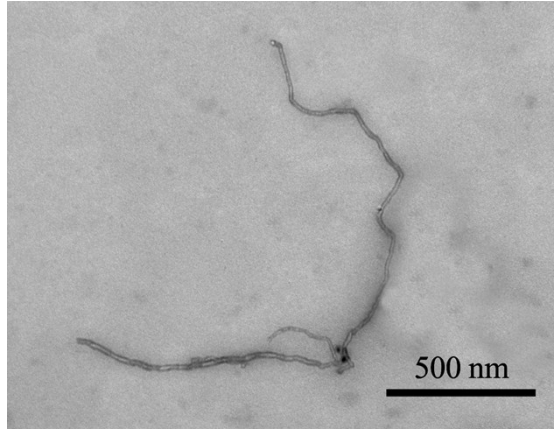

**Fig. S1** TEM picture of MWCNTs in K-medium after sonication.

**Table S1** Primers used for the assay of qRT-PCR

| Gene              | Forward primer           | Reverse primer            |
|-------------------|--------------------------|---------------------------|
| <i>abf-2</i>      | TGGTAATGCACAACCCCTGA     | TTCGTCCGTTCCCTTTTCCT      |
| <i>cnc-4</i>      | GCTTCGCTACATTCTCGTCCT    | GTATCCACCACCATAACCCGC     |
| <i>cnc-7</i>      | GGACGGTACATTCCCATAACC    | CAGGTTCAATGCAGTATGGCTATGG |
| <i>fipr-22/23</i> | GCTGAAGCTCCACACATCC      | TATCCCATTCTCCGTATCC       |
| <i>nlp-29</i>     | TCTTGTCGTCCTTCTCG        | CGTCCATAGCCTCCATA         |
| <i>act-1</i>      | CTGCAGATGTGTGACGACGAGGTT | CTGCAGGAAGCACTTGCGGTGAAC  |
